# Supplementary material for: Mice Deficient in the Respiratory Chain Gene Cox6a2 Are Protected against High-Fat Diet-Induced Obesity and Insulin Resistance
Source: PubMed Central journal article supplement (PMC3584060; doi:10.1371/journal.pone.0056719), 2013-02-27
Supplement: pone.0056719.s005.pdf [file pone.0056719.s005.pdf]

**Table S1: Plasma parameters in fed WT and *Cox6a2*<sup>-/-</sup> mice**

|                         | Regular diet |                              | HFD                    |                              |
|-------------------------|--------------|------------------------------|------------------------|------------------------------|
|                         | WT           | <i>Cox6a2</i> <sup>-/-</sup> | WT                     | <i>Cox6a2</i> <sup>-/-</sup> |
| Age (weeks)             | 13           | 13                           | 18                     | 18                           |
| Body weight (g)         | 21.3 ± 0.6   | 25.9 ± 1.4 <sup>b</sup>      | 27.5 ± 0.9             | 39.9 ± 1.9 <sup>c</sup>      |
| Glucose (mg/dl)         | 132.4 ± 4.6  | 118.8 ± 7.7                  | 133.6 ± 10.8           | 130.0 ± 9.2                  |
| Insulin (ng/ml)         | 0.9 ± 0.1    | 0.6 ± 0.1                    | 3.8 ± 1.3 <sup>d</sup> | 0.7 ± 0.1 <sup>a</sup>       |
| Leptin (ng/ml)          | ND           | ND                           | 43.8 ± 5.5             | 15.9 ± 2.9 <sup>b</sup>      |
| Cholesterol (mg/dl)     | ND           | ND                           | 163.5 ± 20.7           | 109.8 ± 4.0 <sup>a</sup>     |
| HDL-cholesterol (mg/dl) | ND           | ND                           | 140.3 ± 17.6           | 92.4 ± 3.2 <sup>a</sup>      |
| Triglycerides (mg/dl)   | ND           | ND                           | 72.0 ± 3.7             | 46.2 ± 2.0 <sup>c</sup>      |
| ALT (U/l)               | ND           | ND                           | 55.5 ± 18.6            | 33.6 ± 1.1                   |
| AST (U/l)               | ND           | ND                           | 80.3 ± 17.4            | 44.4 ± 2.4                   |

Data are means ± SEM; n = 5 mice in each group.

ND: Not determined.

<sup>a</sup>  $p < 0.05$ .

<sup>b</sup>  $p < 0.01$ .

<sup>c</sup>  $p < 0.001$ .

<sup>d</sup>  $p < 0.05$  versus wild-type mice on regular diet
