# Supplementary material for: Mice Deficient in the Respiratory Chain Gene Cox6a2 Are Protected against High-Fat Diet-Induced Obesity and Insulin Resistance
Source: PubMed Central journal article supplement (PMC3584060; doi:10.1371/journal.pone.0056719), 2013-02-27
Supplement: pone.0056719.s006.pdf [file pone.0056719.s006.pdf]

**Table S2. Gene Set Enrichment Analysis**

| MSigDB Gene sets enriched in <i>Cox6a2</i> <sup>-/-</sup> | Set  |          |          |          |
|-----------------------------------------------------------|------|----------|----------|----------|
|                                                           | size | ES       | NES      | FDR      |
| diaphragm                                                 |      |          |          |          |
| MITOCHONDRION                                             | 318  | 0.541813 | 2.408053 | 0        |
| MITOCHONDRIAL_INNER_MEMBRANE                              | 64   | 0.646979 | 2.311377 | 0        |
| MITOCHONDRIAL_MEMBRANE                                    | 83   | 0.608108 | 2.277644 | 0        |
| ORGANELLE_INNER_MEMBRANE                                  | 72   | 0.612554 | 2.251388 | 0        |
| OXIDOREDUCTASE_ACTIVITY                                   | 253  | 0.512047 | 2.215519 | 4.92E-04 |
| CELLULAR_RESPIRATION                                      | 19   | 0.817346 | 2.20927  | 8.37E-04 |
| OXIDOREDUCTASE_ACTIVITY__ACTING_ON_THE_CH_CH_GRO          |      |          |          |          |
| UP_OF_DONORS                                              | 21   | 0.770929 | 2.188349 | 7.17E-04 |
| MITOCHONDRIAL_PART                                        | 137  | 0.539008 | 2.180786 | 6.28E-04 |
| AEROBIC_RESPIRATION                                       | 15   | 0.837027 | 2.157144 | 5.58E-04 |
| MITOCHONDRIAL_ENVELOPE                                    | 94   | 0.568591 | 2.15611  | 5.02E-04 |
| MITOCHONDRIAL_MEMBRANE_PART                               | 50   | 0.639882 | 2.142122 | 5.69E-04 |
| MITOCHONDRIAL_RESPIRATORY_CHAIN                           | 23   | 0.733358 | 2.138296 | 7.25E-04 |
| COFACTOR_METABOLIC_PROCESS                                | 51   | 0.610434 | 2.081699 | 0.001808 |
| SMALL_GTPASE_REGULATOR_ACTIVITY                           | 66   | 0.580784 | 2.069197 | 0.00212  |
| ELECTRON_CARRIER_ACTIVITY                                 | 70   | 0.565084 | 2.034657 | 0.004112 |
| RAS_GUANYL_NUCLEOTIDE_EXCHANGE_FACTOR_ACTIVITY            | 18   | 0.734683 | 2.022251 | 0.004234 |
| ACTIN_BINDING                                             | 66   | 0.553977 | 1.979963 | 0.007334 |
| ENZYME_ACTIVATOR_ACTIVITY                                 | 120  | 0.491528 | 1.978336 | 0.0072   |
| TRANSMEMBRANE_RECEPTOR_PROTEIN_PHOSPHATASE_ACTI           |      |          |          |          |
| VITY                                                      | 19   | 0.716148 | 1.97641  | 0.007015 |
| LIPID_CATABOLIC_PROCESS                                   | 35   | 0.628509 | 1.958674 | 0.008562 |
| MSigDB gene sets enriched in <i>Cox6a2</i> <sup>-/-</sup> |      |          |          |          |
| gastrocnemius muscle                                      |      |          |          |          |
| MITOCHONDRION                                             | 318  | 0.609892 | 2.606538 | 0        |
| MITOCHONDRIAL_PART                                        | 137  | 0.655147 | 2.594295 | 0        |
| MITOCHONDRIAL_MEMBRANE                                    | 83   | 0.659844 | 2.442682 | 0        |
| MITOCHONDRIAL_ENVELOPE                                    | 94   | 0.656298 | 2.419941 | 2.28E-04 |
| MITOCHONDRIAL_INNER_MEMBRANE                              | 64   | 0.692267 | 2.411105 | 1.82E-04 |
| MITOCHONDRIAL_MEMBRANE_PART                               | 50   | 0.71233  | 2.407003 | 1.52E-04 |
| ORGANELLE_INNER_MEMBRANE                                  | 72   | 0.668519 | 2.381843 | 2.63E-04 |
| ORGANELLE_ENVELOPE                                        | 164  | 0.583077 | 2.354623 | 3.41E-04 |
| ENVELOPE                                                  | 164  | 0.583077 | 2.345933 | 3.03E-04 |
| GOLGI_VESICLE_TRANSPORT                                   | 47   | 0.678286 | 2.256097 | 9.91E-04 |
| ORGANELLE_MEMBRANE                                        | 287  | 0.528384 | 2.248906 | 0.001147 |
| MITOCHONDRIAL_MATRIX                                      | 44   | 0.672492 | 2.203385 | 0.001795 |
| MITOCHONDRIAL_LUMEN                                       | 44   | 0.672492 | 2.183654 | 0.00228  |
| MITOCHONDRIAL_RESPIRATORY_CHAIN                           | 23   | 0.762388 | 2.179369 | 0.002245 |
| ENDOPLASMIC_RETICULUM_MEMBRANE                            | 82   | 0.590786 | 2.158575 | 0.002634 |
| NUCLEAR_ENVELOPE_ENDOPLASMIC_RETICULUM_NETWORK            | 90   | 0.571843 | 2.115288 | 0.006316 |
| PROTEIN_FOLDING                                           | 54   | 0.616916 | 2.103335 | 0.007159 |
| ENDOPLASMIC_RETICULUM_PART                                | 91   | 0.549838 | 2.042313 | 0.01335  |
| OXIDOREDUCTASE_ACTIVITY                                   | 253  | 0.485599 | 2.039597 | 0.013068 |
| MITOCHONDRION_ORGANIZATION_AND_BIOGENESIS                 | 44   | 0.613294 | 2.038418 | 0.012414 |

[http://www.broad.mit.edu/gsea/doc/GSEAUUserGuideFrame.html?\\_Results](http://www.broad.mit.edu/gsea/doc/GSEAUUserGuideFrame.html?_Results)

ES: Enrichment Score

NES: Normalized Enrichment Score

FDR: False Discovery Rate
