# Supplementary material for: Mice Deficient in the Respiratory Chain Gene Cox6a2 Are Protected against High-Fat Diet-Induced Obesity and Insulin Resistance
Source: PubMed Central journal article supplement (PMC3584060; doi:10.1371/journal.pone.0056719), 2013-02-27
Supplement: pone.0056719.s007.pdf [file pone.0056719.s007.pdf]

**Table S3: Gene expression of antioxidant enzymes in *Cox6a2*<sup>-/-</sup> vs WT mice**

|                                     | Diaphragm |         | Gastrocnemius |         |
|-------------------------------------|-----------|---------|---------------|---------|
|                                     | FC*       | p-value | FC*           | p-value |
| Sod1 (superoxide dismutase 1)       | 1,05      | NS      | 0.97          | NS      |
| Sod2 (superoxide dismutase 2)       | 1,46      | 0.01    | 1.07          | NS      |
| Gpx1 (glutathione peroxidase 1)     | 1,72      | 0.006   | 1.03          | NS      |
| Gpx3 (glutathione peroxidase 2)     | 1,07      | NS      | 1.04          | NS      |
| Gpx4 (glutathione peroxidase 3)     | 1,30      | 0.04    | 1.23          | 0.007   |
| Cat (catalase)                      | 1,53      | 0.004   | 0.79          | 0.03    |
| Txn1 (thioredoxin 1)                | 1,36      | 0.004   | 0.96          | NS      |
| Txn2 (thioredoxin 2, mitochondrial) | 1,14      | 0.01    | 1.17          | 0.0008  |
| Prdx1 (peroxiredoxin 1)             | 1,02      | NS      | 1.16          | NS      |
| Prdx2 (peroxiredoxin 2)             | 1,95      | 0.0009  | 1.08          | NS      |
| Prdx3 (peroxiredoxin 3)             | 1,40      | 0.003   | 1.18          | 0.02    |
| Prdx4 (peroxiredoxin 4)             | 2,03      | 0.03    | 1.23          | 0.04    |
| Prdx5 (peroxiredoxin 5)             | 1,32      | 0.008   | 1.06          | NS      |
| Prdx6 (peroxiredoxin 6)             | 1,72      | 0.004   | 1.11          | NS      |

\* Fold change expression in *Cox6a2*<sup>-/-</sup> over WT mice
