# Supplementary material for: Mice Deficient in the Respiratory Chain Gene Cox6a2 Are Protected against High-Fat Diet-Induced Obesity and Insulin Resistance
Source: PubMed Central journal article supplement (PMC3584060; doi:10.1371/journal.pone.0056719), 2013-02-27
Supplement: pone.0056719.s008.pdf [file pone.0056719.s008.pdf]

**Table S4. Primers and probes used for quantitative PCR**

|                |       |                                          |
|----------------|-------|------------------------------------------|
| RNA Pol II     | FW    | GCACCACGTCCAATGATATTGTG                  |
|                | Rev   | GGAGATGACATGGTACAGTTCTCG                 |
|                | Probe | (FAM)CTTCCGCACAGCCTCAATGCCAGT(TAMRA)     |
| Beta actin     | FW    | AGCCATGTACGTAGCCATCCA                    |
|                | Rev   | TCTCCGGAGTCCATCACAATG                    |
|                | Probe | (FAM)TGTCCCTGTATGCCTCTGGTCGTAC(TAMRA)    |
| Cox6a2         | FW    | CGAGCGCCCAGAGTTCATC                      |
|                | Rev   | GATTGTGAAAAGCGTGTGGTTG                   |
|                | Probe | (FAM)CACCTCCGCATCCGAACCAAGCCCTTC(TAMRA)  |
| Ucp1           | FW    | CTGCCAAAGTCCGCCTTC                       |
|                | Rev   | GGTCCCTAGGACACCTTTATACC                  |
|                | Probe | (FAM)ACTGGAAGCCTGGCCTTCACCTTGG(TAMRA)    |
| Ucp2           | FW    | CCTGAAAGCCAACCTCATGAC                    |
|                | Rev   | GATGACGGTGGTGCAGAAG                      |
|                | Probe | (FAM)CCTCCCTTGCCACTTCACTTCTGCCTTC(TAMRA) |
| Pgc-1 $\alpha$ | FW    | CGAACCTTAAGTGTGGA ACTCTC                 |
|                | Rev   | GGTTATCTTGGTTGGCTTTATGAGG                |
|                | Probe | (FAM)CTGCAGGCCTAACTCCTCCCACA ACTC(TAMRA) |
